# Supplementary material for: Effects of Reduced Prolamin on Seed Storage Protein Composition and the Nutritional Quality of Rice
Source: Int J Mol Sci. 2013 Aug 19;14(8):17073–84. doi: 10.3390/ijms140817073 (PMC3759952; doi:10.3390/ijms140817073)
Supplement: Supplementary file 1 [file ijms-14-17073-s001.pdf]

## Supplementary Materials

**Table S1.** Genes and primer sequences used for qRT-PCR.

| Target Gene                        | Primer name | Forward primer         | Reverse primer         | Accession No. |
|------------------------------------|-------------|------------------------|------------------------|---------------|
| <b>Prolamin 10 kD</b>              | 10 kD       | TTATTTGTGCTGGACTCGGG   | GAGAGTTGGAAGTTGACAGGG  | EF122448      |
| <b>Prolamin 13 kD Class I</b>      | 13 kD-I     | CAACTACAGTCGCATCTCCTAC | GGGTTGCCACTATGCTATACTG | EF122447      |
| <b>Prolamin 13 kD Class II</b>     | 13 kD-II    | GCTCTGTTGGCTTTTAACGTG  | ACTCATTACAAGACACCGCC   | GU120358      |
| <b>Prolamin 13 kD Class III</b>    | 13 kD-III   | TCACCCGTGTTTCAACTGAG   | CACAATAGCCTGAACACTGC   | FJ940200      |
| <b>Prolamin 16 kD</b>              | 16 kD       | CTCAATTTGCCCTCCATGTG   | AGAACCGCAATGACCAGTAG   | EF122449      |
| <b>Glutelin A</b>                  | GluA        | AATGATGGTGAAGTGCCGGT   | TCACGCCTGTATGCTTGAGG   | EF122456      |
| <b>Glutelin B</b>                  | GluB        | ATTGAGCAACACTCTGGGCA   | TGGCTCTGTAGCCTCTTTGC   | EF122460      |
| <b>Glutelin C</b>                  | GluC        | CACAAGGGCCAATAGCCAGA   | GGTCACGTACATCACCGTGT   | EF122465      |
| <b>Glutelin D</b>                  | GluD        | AAGACAGAGCGACCAAGCTC   | ATGTGCAACACTAGCCGGAA   | EF122464      |
| <b>Globulin-1</b>                  | Glb-1       | AGTCGGAGATGAGGTTTCAGG  | GAACATCGGCTGGAACCTC    | GQ848069      |
| <b>ER luminal binding protein</b>  | BiP         | AGGACATCAGCAAGGACAAC   | GGACTCAATCTCAACACGGAC  | AK065743      |
| <b>Protein disulfide isomerase</b> | PDI         | CCGATTGTTCTTGCCAAGGTTG | TCCTGAATGTTCTTGCCCTG   | AK068268      |
| <b>calnexin</b>                    | CNX         | TCGACAACCCCAACTACAAAG  | ATCTCAATCCCAATAGCGGC   | AK069118      |
| <b>Ubiquitin</b>                   | Ubi         | GAAGTAAGGAAGGAGGAGGA   | AAGGTGTTCAAGTTCCAAGG   | EF575840      |
